# Supplementary material
Source: PubMed Central journal article supplement (PMC3298746)

**Supplemental Table 1. Primers used for Real Time PCR experiments.**

| <b>Primer name</b> | <b>Sequence</b>           |
|--------------------|---------------------------|
| Leptin-F           | GCTGGAGACCCCTGTGTCGGT     |
| Leptin-R           | GCCAGTGACCCTCTGCTTGGC     |
| Adiponectin-F      | CACACCAGGCCGTGATGGCA      |
| Adiponectin-R      | CAGTGACGCGGGTCTCCAGC      |
| Adipsin-F          | GCTCTGCGACGTGGCTGGTT      |
| Adipsin-R          | CGCACACTAGAGGGCTGCCG      |
| Akp2-F             | TTGGGCAGGCAAGACACAGA      |
| Akp2-R             | TTGGCAACCCTGGGTAGACAG     |
| BMP4-F             | AGTCCAGCTATAGGGAAGCAGTTTG |
| BMP4-R             | TCCACTGGCTGATCACCTCAAC    |
| BMP6-F             | TTGGGGGAGGCGAACATTAGGTA   |
| BMP6-R             | CTGCGCACCAACCAAACCTGAA    |
| FGF7-F             | AGCGGAGGGGAAATGTTCG       |
| FGF7-R             | TCCAGCCTTTCTTGGTTACTGAGA  |
| BMP4-F             | AGTCCAGCTATAGGGAAGCAGTTTG |
| BMP4-R             | TCCACTGGCTGATCACCTCAAC    |
| BMP6-F             | TTGGGGGAGGCGAACATTAGGTA   |
| BMP6-R             | CTGCGCACCAACCAAACCTGAA    |
| Ebf1-F             | CCCGTGGAGATTGAGAGGAC      |
| Ebf1-R             | AGTCGATGAGGCGCACATA       |
| FGF10-F            | ATTTCCCCCTGTATGCATCCTAAC  |
| FGF10-R            | TTCCCACGGAGGCAGAACTC      |
| PDGFA-F            | GCGGTGGTGGACCCGTGAAG      |
| PDGFA-R            | CCGGGAGTTGATCGAGCGGC      |
| PDGFB-F            | CCCTGTGTGGAGGTGCAGCG      |
| PDGFB-R            | GACACGGCCCAGGTCACACG      |
| PDGFD-F            | CACAGGCGGTGAAGGCGAGG      |
| PDGFD-R            | TCCTGGGAACGGAGCCACCA      |
| PPAR $\gamma$ -F   | AAGCCCATCGAGGACATCCA      |
| PPAR $\gamma$ -R   | CGGGTGGGACTTTCCTGCTA      |

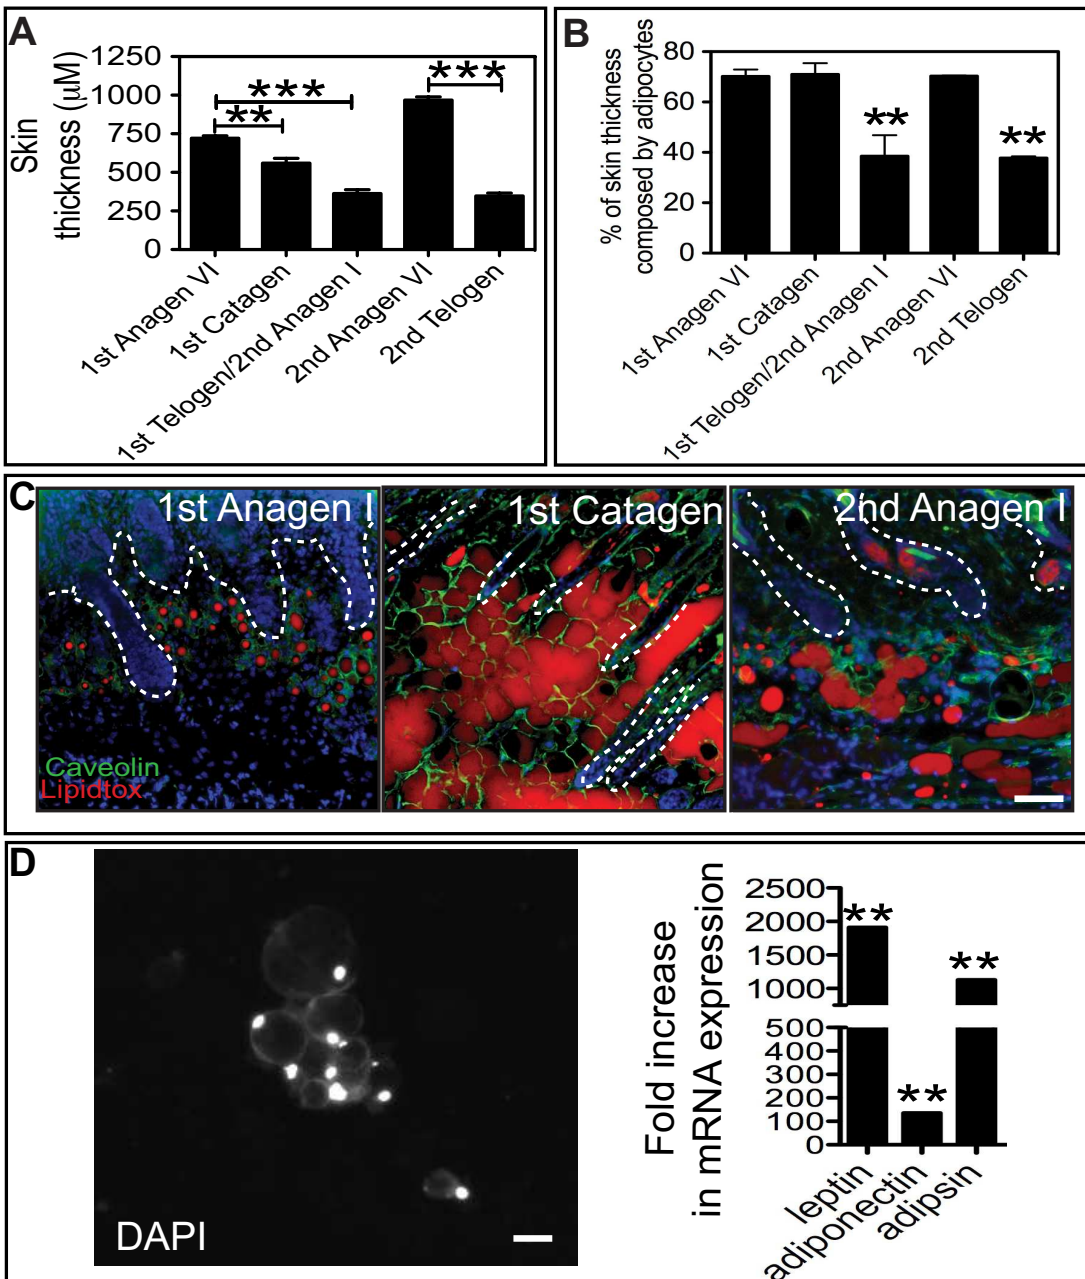

Supplemental Figure 1, Data relevant to Figure 1

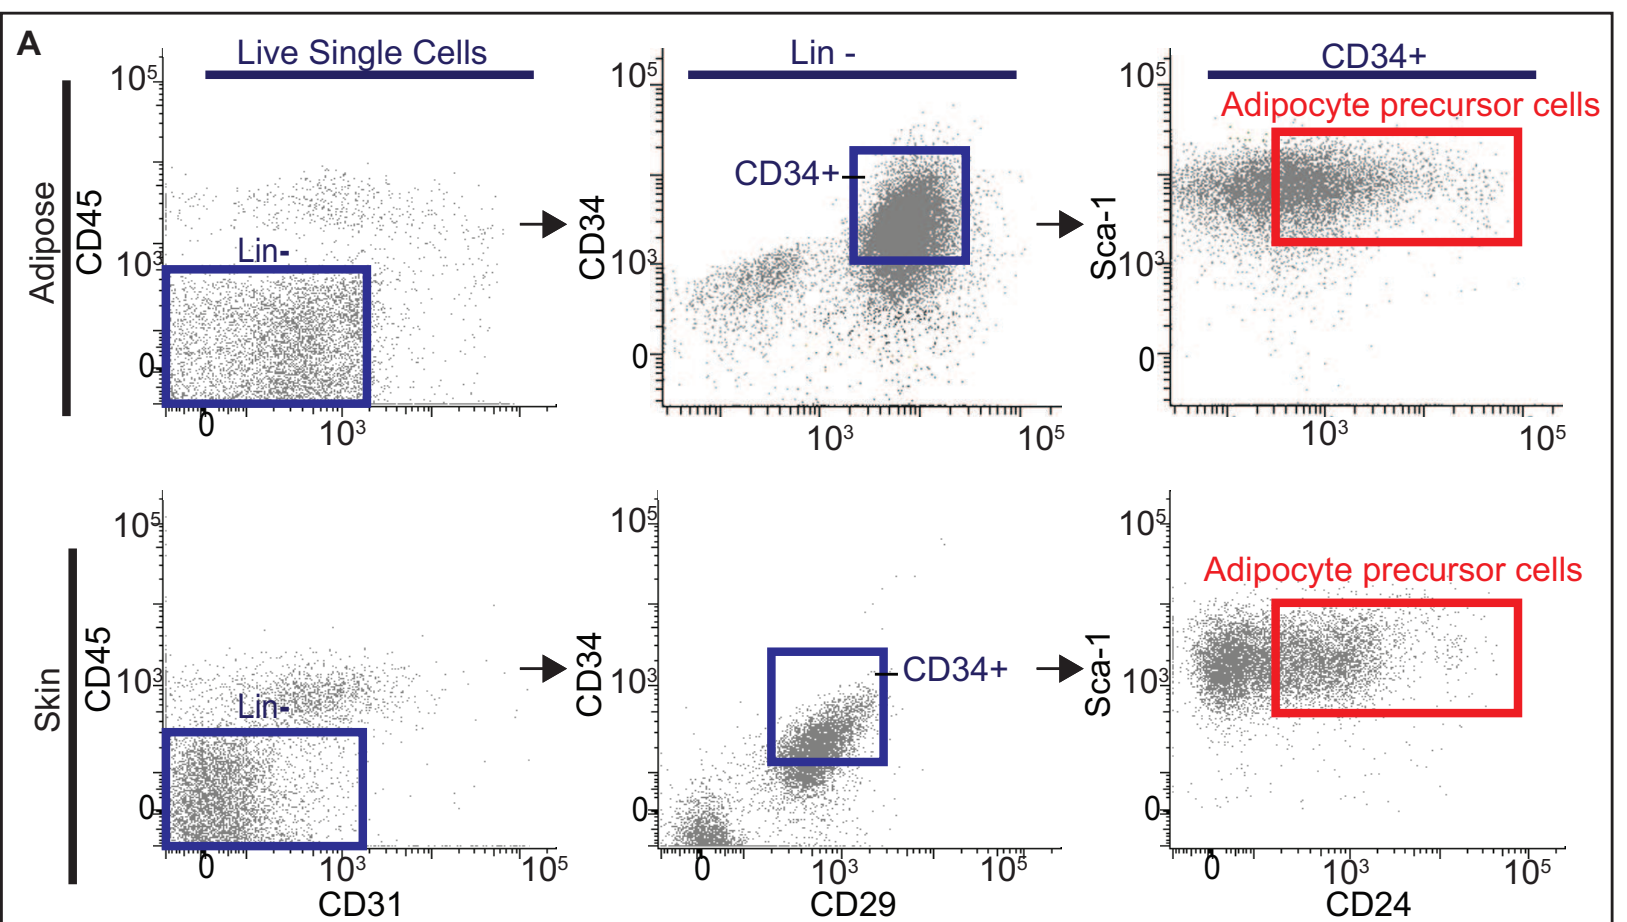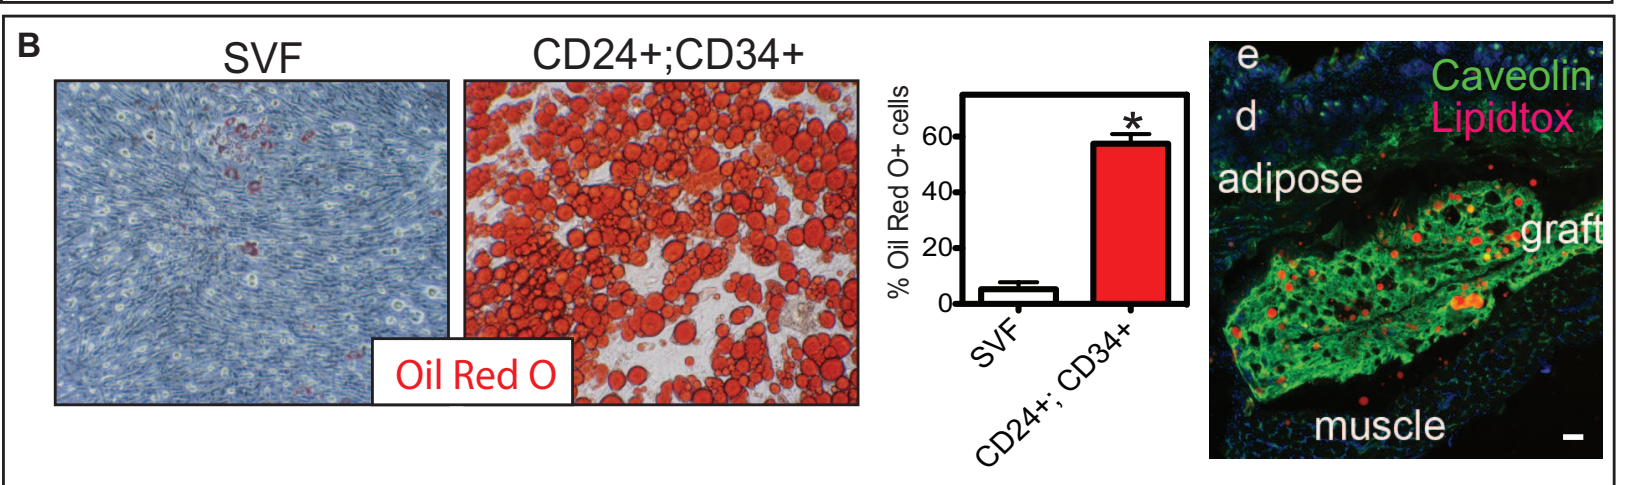

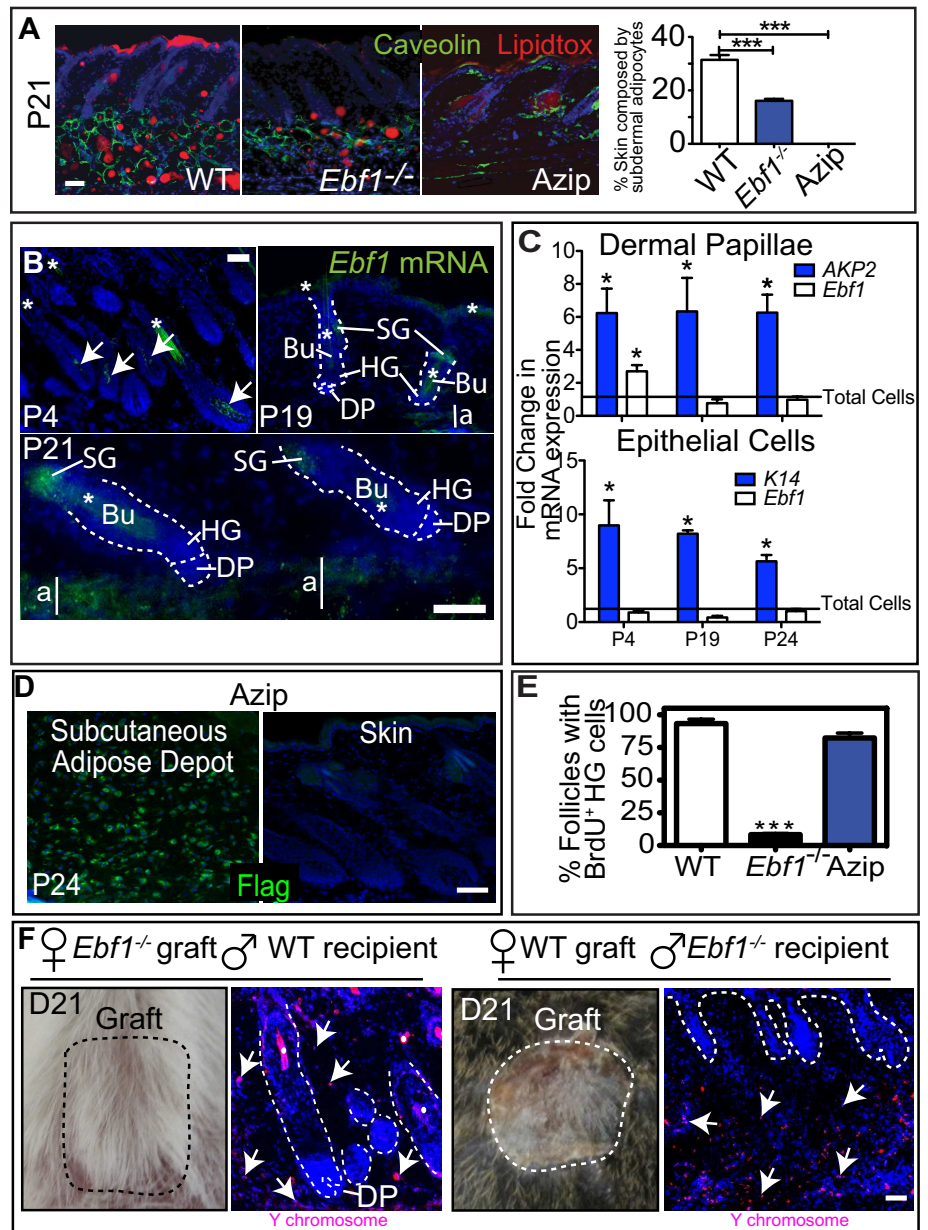



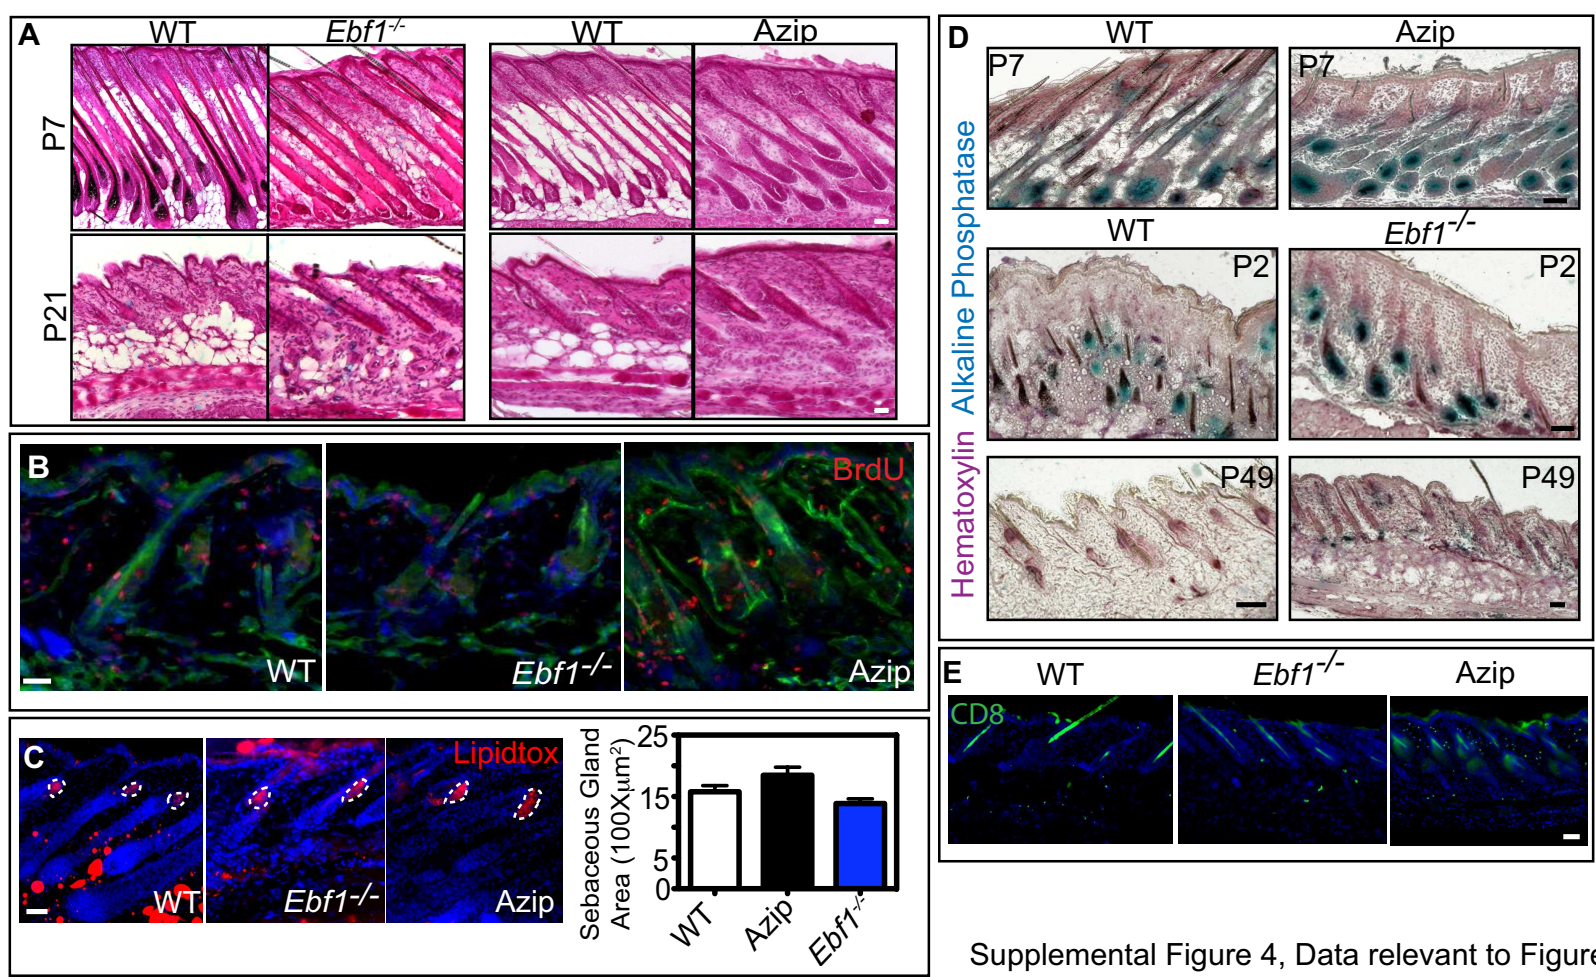

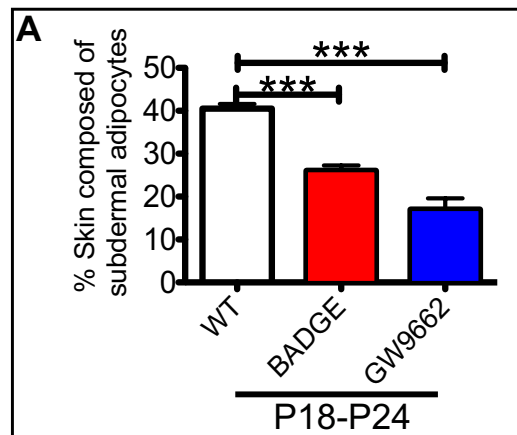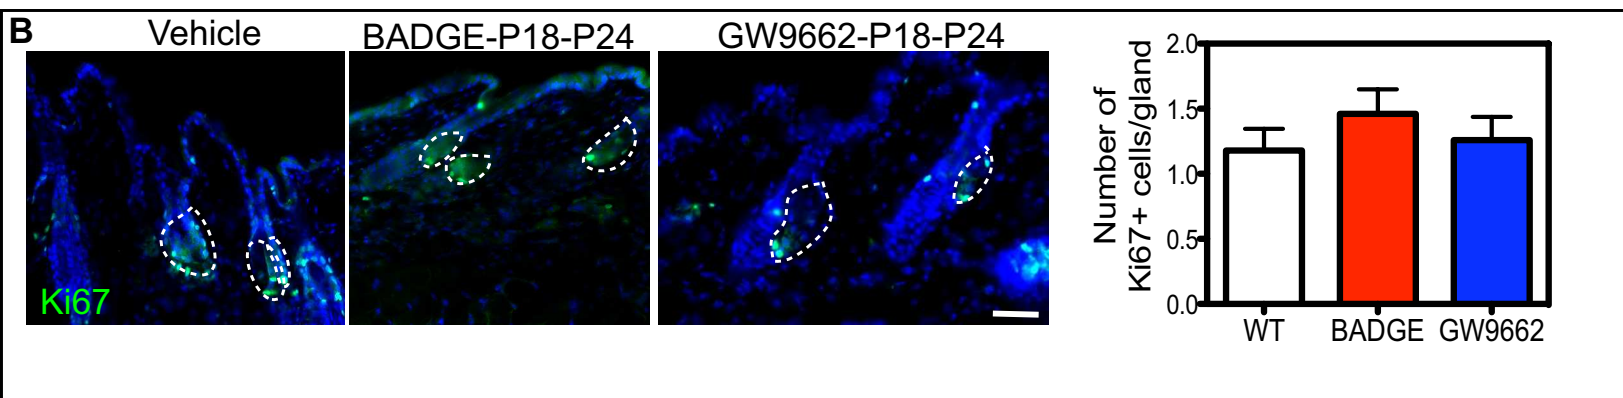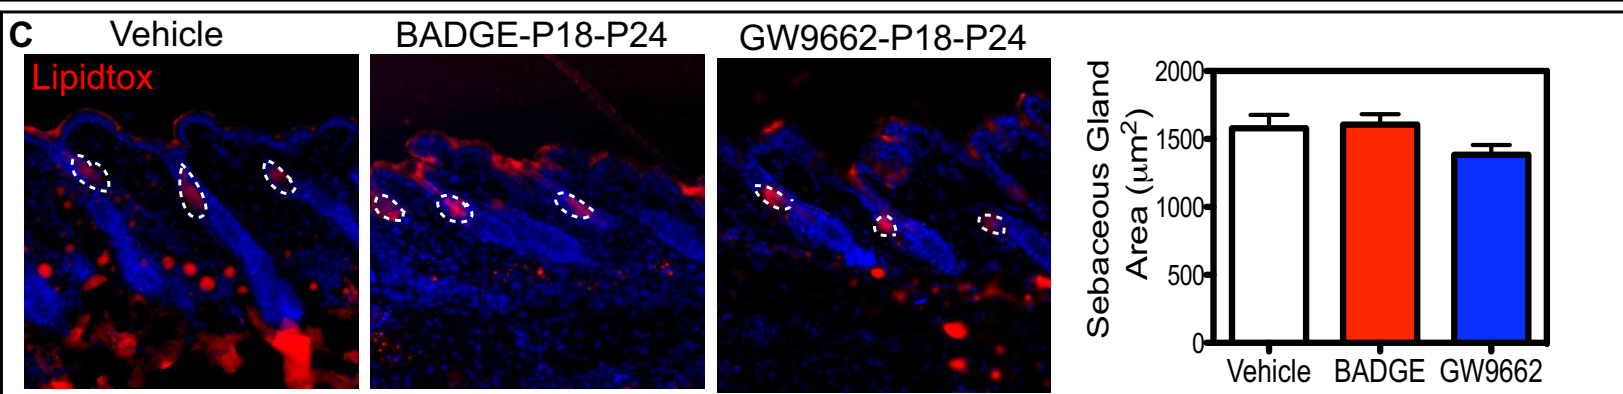

Supplement: NIHMS314930-supplement-02.pdf [file NIHMS314930-supplement-02.pdf]
